Anesthesiology  
1996; 85:522-35  
© 1996 American Society of Anesthesiologists, Inc.  
Lippincott-Raven Publishers

## Multicenter Study of Target-Controlled Infusion of Propofol-Sufentanil or Sufentanil-Midazolam for Coronary Artery Bypass Graft Surgery

Uday Jain, Ph.D., M.D.,\* Simon C. Body, M.B., Ch.B., F.A.N.Z.C.A.,† Wayne Bellows, M.D.,‡  
Richard Wolman, M.D.,§ Christina Mora Mangano, M.D.,|| Joseph Mathew, M.D.,# Elizabeth Youngs, M.D.,\*\*  
Robert Wilson, Ph.D.,†† Adam Zhang, M.D.,†† Dennis T. Mangano, Ph.D., M.D.‡‡  
for the Multicenter Study of Perioperative Ischemia (McSPI) Research Group§§

**Background:** The use of target-controlled infusions of anesthetics for coronary artery bypass graft surgery has not been studied in detail. The effects of target-controlled infusions of propofol or sufentanil, supplemented by infusions of sufentanil or midazolam, respectively, were evaluated and compared.

**Methods:** At 14 clinical sites, 329 patients were given a target-controlled infusion of propofol (n = 165) to produce effect-site concentration (C<sub>e</sub>) of  $\geq 3$ - $\mu\text{g}/\text{ml}$  or a target-controlled infu-

sion of sufentanil (n = 164). Sufentanil or midazolam, respectively, also were infused. Systolic hypertension, hypotension, tachycardia, and bradycardia were assessed by measuring heart rate and blood pressure every minute during operation. Myocardial ischemia was assessed perioperatively by monitoring ST segment deviation *via* continuous three-lead Holter electrocardiography, and it was evaluated during operation by monitoring left ventricular wall motion abnormality *via* transesophageal echocardiography.

**Results:** The measured cardiovascular parameters were satisfactory and usually similar for the patients receiving propofol-sufentanil or sufentanil-midazolam. The primary endpoint of the percentage of patients with intraoperative ST segment deviation ( $23 \pm 6\%$  vs.  $24 \pm 6\%$ ,  $P = 0.86$ ) did not differ significantly between the two groups. The incidence of left ventricular wall motion abnormality shown on transesophageal echocardiography before ( $19 \pm 4\%$  vs.  $26 \pm 4\%$ ,  $P = 0.25$ ) and after ( $23 \pm 4\%$  vs.  $31 \pm 5\%$ ,  $P = 0.32$ ) cardiopulmonary bypass also did not differ significantly for the two groups. Changes in intraoperative target concentration were more frequent with propofol-sufentanil anesthetic than with sufentanil-midazolam ( $11.7 \pm 7.1$  vs.  $7.3 \pm 3.6$ ,  $P < 0.001$ ). The incidence of intraoperative hypotension ( $77\%$  vs.  $55\%$ ,  $P < 0.001$ ), the use of inotropic/vasopressor medications ( $93\%$  vs.  $84\%$ ,  $P = 0.01$ ), and the administration of crystalloids ( $2.8 \pm 1.4$  L vs.  $2.4 \pm 1.2$  L,  $P < 0.001$ ) were significantly greater in the propofol-sufentanil group. Conversely, the incidence of intraoperative hypertension ( $43\%$  vs.  $54\%$ ,  $P = 0.05$ ) and the use of antihypertensive/vasodilator medications ( $70\%$  vs.  $90\%$ ,  $P < 0.001$ ) were significantly less in the propofol-sufentanil group.

**Conclusions:** Target-controlled infusions of propofol or sufentanil, supplemented by infusions of sufentanil or midazolam, respectively, were suitable to provide anesthesia for coronary artery bypass graft surgery. Continuous monitoring revealed a high prevalence of hemodynamic abnormalities. Despite greater hypotension in the propofol-sufentanil group and greater hypertension in the sufentanil-midazolam group, episodes of myocardial ischemia were similar for both groups and were not temporally related to episodes of hemodynamic abnormalities. (Key words: Anesthesia: cardiac. Anesthetics, intravenous: midazolam; propofol; sufentanil. Anesthetic techniques: computer-assisted continuous infusion. Heart: hemodynamics; infarction; ischemia. Monitoring: electrocardi-

\* Assistant Professor of Anesthesia, University of California, San Francisco.

† Instructor in Anesthesia, Harvard Medical School.

‡ Assistant Clinical Professor of Anesthesia, University of California, San Francisco.

§ Associate Professor of Anesthesiology, Medical College of Virginia.

|| Assistant Professor of Anesthesia, Stanford University.

# Assistant Professor of Anesthesia, Yale University.

\*\* Clinical Instructor of Anesthesia, Stanford University.

†† Research Associate, Ischemia Research and Education Foundation.

‡‡ Professor of Anesthesia, University of California, San Francisco.

§§ See Appendices I and II.

Received from the Departments of Anesthesia, at the University of California, San Francisco, California; Harvard Medical School, Boston, Massachusetts; Stanford University, Stanford, California; and Yale University, New Haven, Connecticut; the Department of Anesthesiology at the Medical College of Virginia, Richmond, Virginia; the Ischemia Research and Education Foundation, San Francisco, California; and the Institutions of the McSPI Research Group. Submitted for publication December 6, 1995. Accepted for publication May 20, 1996. Supported in part by grants from Zeneca Pharmaceuticals and the Ischemia Research and Education Foundation. Presented in part at the annual meeting of the American Society of Anesthesiologists, San Francisco, California, October 18, 1994.

Address reprint requests to Dr. Jain: University of California, San Francisco, Anesthesiology Service (129), Department of Veterans Affairs Medical Center, 4150 Clement Street, San Francisco, California 94121. Electronic mail: uday\_jain@quickmail.ucsf.edu.

## TARGET CONTROL OF ANESTHETICS FOR CABG SURGERY

ography; Holter electrocardiography; transesophageal echocardiography. Surgery: cardiac; coronary artery bypass graft.)

TO provide anesthesia for coronary artery bypass graft (CABG) surgery, an opioid is usually delivered in combination with a hypnotic drug or a potent inhalational anesthetic.<sup>1,2</sup> A target-controlled infusion is desirable for administering an intravenous anesthetic.<sup>3</sup> Rapid emergence from sufentanil anesthesia, combined with its potency, make it an opioid of choice for CABG surgery. For infusion, propofol and midazolam are two of the most commonly used hypnotic drugs. Target-controlled infusions of propofol and sufentanil may be useful for CABG surgery. However, the effects on cardiovascular parameters of anesthetics administered by target-controlled infusion during all stages of CABG surgery are unknown.

Target-controlled infusion of propofol when combined with an opioid<sup>4</sup> or nitrous oxide<sup>5</sup> may cause hypotension<sup>4,5</sup> and bradycardia.<sup>4</sup> Patients with coronary artery disease may be especially susceptible to myocardial ischemia and other adverse effects of hypotension.<sup>6</sup> Although the use of propofol and opioids during CABG surgery is reported to be associated with acceptable hemodynamics at certain stages of CABG surgery,<sup>1,2</sup> hemodynamic abnormalities detected by continuous observation throughout surgery have not been described.

This study evaluated and compared the cardiovascular responses to two anesthetic regimens using target-controlled infusion of propofol or sufentanil. As clinically indicated, supplementation was provided with sufentanil or midazolam infusion, respectively. The primary endpoint for comparing the two groups was the percentage of patients with intraoperative ST segment deviation. We also determined the occurrence of tachycardia, bradycardia, systolic hypertension, and hypotension from heart rate and blood pressure recorded every minute during operation. For the two anesthetic regimens, we determined the number of intraoperative target concentration changes; the use of cardiovascular medications; the occurrence of ischemic changes detected by continuous perioperative electrocardiography (ECG) and continuous intraoperative transesophageal echocardiography (TEE); myocardial infarction (MI); and major adverse clinical events.

||| Address requests for information to Steven L. Shafer, M.D., Anesthesiology Service 112A, Department of Veterans Affairs Medical Center, 3801 Miranda Avenue, Palo Alto, California 94304.

## Materials and Methods

### Study Participants

After obtaining institutional approval and written informed consent from participants, we enrolled 329 patients undergoing CABG surgery at 14 academic medical centers in the United States (appendix I) during the period from June 1992 through December 1993. To be included in the study, patients had to be at least 35 yr old, be scheduled for nonemergent CABG surgery with no other planned surgical procedure, and have a left ventricular ejection fraction greater than 25%, at least 50% stenosis of the left main coronary artery, or at least 70% stenosis of two or more major coronary arteries. We excluded patients with preoperative evolving MI, increased serum concentrations of creatine kinase myocardial band (CK-MB), hemodynamic instability with systolic blood pressure (SBP) less than 90 mmHg, cardiogenic shock, unsuccessful coronary angioplasty within 24 h before surgery, ECG uninterpretable for S-T segment deviation due to cardiac conduction changes or use of a ventricular pacemaker, or esophageal disease that precluded placement of a TEE probe.

Patients meeting these criteria were randomly assigned to receive either a target-controlled infusion of open-label propofol ( $n = 165$ ) and an infusion of sufentanil, or target-controlled infusion of open-label higher-dose (*vide infra*) sufentanil ( $n = 164$ ) and an infusion of midazolam.

### Anesthetic Management

Lorazepam (1 to 4 mg) was administered orally the evening before surgery. Morphine sulfate (0 to 0.2 mg/kg given intramuscularly or intravenously) and midazolam (0 to 0.1 mg/kg given intramuscularly or intravenously) were administered 60 to 90 min before surgery. Usual cardiac medications were continued until surgery.

For sedation during catheter placement before induction of anesthesia, patients in the propofol-sufentanil group were eligible to receive an infusion of propofol to a target plasma concentration of 0.25 to 0.75  $\mu\text{g/ml}$ . Patients in the sufentanil-midazolam group were eligible to receive 0 to 0.05 mg/kg midazolam intravenously for sedation.

A Harvard 22 computer-controlled pump (Harvard Apparatus, South Natick, MA) was used to produce the desired target plasma concentration ( $C_p$ ) or effect-site concentration ( $C_e$ ) of propofol or sufentanil. At 13 of the 14 clinical sites, STANPUMP software<sup>|||</sup> was used



to apply pharmacokinetic models of propofol<sup>##</sup> or sufentanil.<sup>7</sup> One site, Duke University, used Computer Assisted Continuous Infusion (CACI) II software.<sup>\*\*\*</sup> The pharmacokinetic parameters employed by CACI II for sufentanil<sup>7</sup> were identical to those used by the other sites, but the pharmacokinetic parameters used by CACI II for propofol<sup>8</sup> were slightly different. The infusion software recorded the times, rates of drug infusion, and the predicted  $C_p$  and  $C_e$ . The other anesthetic (sufentanil or midazolam, respectively) was infused through a constant-rate pump that did not keep an automated record. The total doses of the anesthetics administered were recorded.

For the propofol-sufentanil group,  $C_p$  was at least 3  $\mu\text{g}/\text{ml}$  during induction of anesthesia, and  $C_e$  was at least 3  $\mu\text{g}/\text{ml}$  during maintenance of anesthesia. If the depth of anesthesia required adjustment,  $C_e$  was changed in 0.5- to 1- $\mu\text{g}/\text{ml}$  increments in the range of 3 to 10  $\mu\text{g}/\text{ml}$ . During induction, as clinically indicated, a 0- to 0.5- $\mu\text{g}/\text{kg}$  bolus of sufentanil was administered. During maintenance, as clinically indicated, sufentanil was infused at a rate of 0 to 0.6  $\mu\text{g} \cdot \text{kg}^{-1} \cdot \text{h}^{-1}$  for the first 2 h, decreased by 0.1  $\mu\text{g} \cdot \text{kg}^{-1} \cdot \text{h}^{-1}$  for the next 3 h, and decreased again by 0.1  $\mu\text{g} \cdot \text{kg}^{-1} \cdot \text{h}^{-1}$  thereafter. When a change in anesthetic administration was required due to hemodynamic changes, the administration of propofol was varied within the protocol limits before sufentanil administration was altered.

For the sufentanil-midazolam group, the baseline sufentanil  $C_e$  was 3 ng/ml from induction of anesthesia until cardiopulmonary bypass (CPB), 1 ng/ml during CPB, and 0.6 ng/ml after CPB. If adjustment in the depth of anesthesia was required,  $C_e$  was changed in 0.5- to 1-ng/ml increments in the range of 0.6 to 6 ng/ml. The baseline rate for infusion of midazolam was 30  $\mu\text{g} \cdot \text{kg}^{-1} \cdot \text{h}^{-1}$  from induction of anesthesia to skin closure. If an increase in the depth of anesthesia was required, a 0- to 20- $\mu\text{g}/\text{kg}$  bolus of midazolam was administered, followed by an increase in the infusion of 0 to 6  $\mu\text{g} \cdot \text{kg}^{-1} \cdot \text{h}^{-1}$ . If clinically indicated, infusion of midazolam could be decreased or discontinued. When a change in anesthetic administration was required because of hemodynamic changes, the administration of sufentanil was varied within the protocol limits before the administration of midazolam was altered.

## Dyck JB, Varvel J, Hung O, Shafer SL: The pharmacokinetics of propofol vs. age (abstract). *ANESTHESIOLOGY* 1991; 75:A315.

\*\*\* Address requests for information to James R. Jacobs, M.D., Department of Anesthesia, Duke University, Durham, North Carolina 27710.

Both groups were given vecuronium for neuromuscular blockade. Antiischemic medications such as nitrates and calcium-channel blockers were given only if the following indicators of ischemia occurred: new ST segment deviation, new left ventricular wall motion abnormality, or increased pulmonary artery pressure. After operation, both groups were given morphine and midazolam for analgesia and sedation.

#### Cardiovascular Medications

The cardiovascular medications administered before, during, and up to the first day after operation were recorded. Because of the many medications used, the data were tabulated as the percentage of patients receiving each class of medications during each period.

#### Hemodynamic Monitoring

We determined baseline values for noninvasive SBP and heart rate (HR) by averaging three values obtained at rest before operation. During operation, SBP obtained *via* arterial cannula and HR were recorded every minute using ARKIVE (Diatek, San Diego, CA) and the monitoring equipment at the clinical site. A pulmonary artery catheter was used to determine cardiac output and pulmonary artery pressures.

For the prebypass period, hypertension was defined as SBP greater than 120% of the preoperative baseline value. According to the protocol, hypertension was treated by increasing the dose of anesthetic and, if necessary, by infusing sodium nitroprusside. Hypotension, defined as SBP less than 80% of the baseline, was treated by reducing the dose of anesthetic and administering fluids, phenylephrine, ephedrine, epinephrine, dopamine, or calcium chloride. Tachycardia, defined as HR greater than 120% of baseline, was treated by increasing the dose of anesthetic or infusing esmolol. Bradycardia, defined as HR less than 80% of the baseline, was treated if clinically indicated.

During CPB, mean arterial pressure was maintained between 40 and 80 mmHg by changing the depth of anesthesia or administering phenylephrine or sodium nitroprusside. After CPB, the limits for hypertension, hypotension, tachycardia, and bradycardia were defined as 140 mmHg, 90 mmHg, 100 beats/min, and 60 beats/min, respectively. The ventricular rate, whether paced or intrinsic, was used to detect episodes of tachycardia and bradycardia. Treatment of hemodynamic abnormalities was similar to that in the pre-CPB period.

An episode of HR or SBP abnormality was diagnosed if at least four of five consecutive per-minute HR or

SBP samples ex  
than 5 min after  
old, the episode  
investigators (a  
the SBP and HR  
ity. Any differ  
consultation wit  
the percentage  
SBP abnormality  
hour of monitor  
periods and for

#### Holter Electro

To compare t  
many endpoint a  
intraoperative e  
elevation. We u  
lated Holter mon  
ics, Milwaukee,  
bipolar leads CL  
started the even  
48 h after ward  
divided into pre  
postoperative pe

Holter ECG re  
quette SX8000  
tained by the inv  
additional invest  
Holter monitoring  
identification of  
not done becau  
change in cardi  
branch block, ir  
superior QRS axi  
leads). Because o  
during monitorin  
ation was deter  
block. The durati  
uninterpretable E  
diac conduction

An episode of S  
a new ischemic  
mm from local b  
and was separate  
min.<sup>10-13</sup> We rec  
and at onset of th  
and the new ST s  
(i.e., area under t  
For each perio  
two groups, we d

## TARGET CONTROL OF ANESTHETICS FOR CABG SURGERY

SBP samples exceeded the threshold. If a sample less than 5 min after an episode also exceeded the threshold, the episode was extended to that sample. Two investigators (appendix II) independently evaluated the SBP and HR data to identify episodes of abnormality. Any differences between them were resolved in consultation with a third investigator. We determined the percentage of patients having episodes of HR or SBP abnormality and the duration of such episodes per hour of monitoring for the pre-CPB, CPB, and post-CPB periods and for the entire intraoperative period.

#### *Holter Electrocardiography*

To compare the two groups, we specified the primary endpoint as the percentage of patients who had intraoperative episodes of ST segment depression or elevation. We used a three-channel amplitude modulated Holter monitor (series 8500; Marquette Electronics, Milwaukee, WI) to continuously record modified bipolar leads CM<sub>5</sub>, CC<sub>5</sub>, and ML.<sup>9</sup> Recording usually started the evening before surgery and continued for 48 h afterward. The total duration of monitoring was divided into preoperative, pre-CPB, CPB, post-CPB, and postoperative periods.

Holter ECG recordings were screened using a Marquette SXP Laser Holter scanner. The ECG data obtained by one investigator (level I) were verified by two additional investigators (levels II and III). A duration of Holter monitoring was said to be uninterpretable if identification of ischemic ST segment deviation was not done because of noise; ventricular pacing; or change in cardiac conduction, that is, left bundle branch block, intraventricular conduction defect, or superior QRS axis (rS complexes in all the monitored leads). Because only lateral and inferior leads were used during monitoring, the occurrence of ST segment deviation was determined during right bundle branch block. The durations of right bundle branch block and uninterpretable ECG due to ventricular pacing and cardiac conduction change were determined.

An episode of ST segment deviation was defined as a new ischemic ST segment deviation of at least 1 mm from local baseline, which lasted at least 1 min and was separated from other episodes by at least 1 min.<sup>10-13</sup> We recorded the HR at the local baseline and at onset of the episode, duration of the episode, and the new ST segment deviation-duration integral (*i.e.*, area under the curve).

For each perioperative period and for each of the two groups, we determined the percentage of patients

in whom an episode of ST segment depression or elevation began during that period.<sup>14</sup> To determine the severity of ischemia, during each period and for each patient, we divided the number of episodes of ST segment deviation that had onset, the total minutes of ST segment deviation, and the area under the curve by hours of data interpretable for ST segment deviation. If an episode continued from one period to another, the portion of the episode occurring in each period was assigned to that period when determining duration and area under the curve of ST segment deviation. During CPB, ST segment deviation was determined when the QRS complex was present before and after cardioplegic arrest.

#### *Transesophageal Echocardiography*

From induction of anesthesia to chest closure, a TEE probe recorded the midpapillary short-axis view of the left ventricle during cardiac contractions. For the pre-CPB period, we analyzed 60-sec samples of TEE recordings obtained every 15 min and at other times of clinical interest listed elsewhere.<sup>9</sup> For the post-CPB period, we analyzed samples obtained every 5 min.<sup>9</sup> Using papillary muscles as the landmarks, we divided the images into four segments: posterior, septal, anterior, and lateral. The wall motion in each segment was graded as follows: 0 = normal wall motion, 1 = mild hypokinesia, 2 = severe hypokinesia, 3 = akinesia, and 4 = dyskinesia. For each patient, the lowest score for each segment before CPB was used as baseline. An episode of wall motion abnormality was defined as worsening of the wall motion of any segment by two or more grades for at least 1 min.<sup>9</sup> The analysis performed by one investigator was verified by another investigator. Any differences between them were resolved in consultation with a third investigator, if necessary. The interexamination variability in our laboratory is within acceptable limits.<sup>9</sup>

#### *Myocardial Infarction*

Q wave MI was defined as the occurrence of a significant new perioperative Q wave on 12-lead ECG. Electrocardiograms were recorded before operation, when patients arrived in the intensive care unit after surgery, in the morning on postoperative days 1 and 2, and when clinically indicated. Each ECG was analyzed by two physician-electrocardiographers (appendix II) using the Minnesota Code.<sup>15</sup> The ECGs of patients who were judged by either electrocardiographer as having definite, probable, or possible MI were re-



viewed by three additional electrocardiographers, whose majority vote determined the presence or absence of "Q wave MI."

We measured CK and its myocardial fraction (CK-MB) before operation, when patients arrived in the intensive care unit after surgery, and every 8 h for 48 h thereafter. Creatine kinase myocardial band values were determined at the clinical sites; 13 sites used electrophoresis to detect CK-MB activity (U/l), and three sites used immunoassay to measure CK-MB mass ( $\mu\text{g/l}$ ). Concentrations of CK-MB exceeding 100 U/l or  $\mu\text{g/l}$  were considered indicative of "CK-MB MI." These two thresholds, although different, were used in the absence of other widely applied thresholds.

#### Other Adverse Cardiovascular Outcomes

We also recorded the occurrence of other adverse postoperative cardiovascular outcomes<sup>14</sup>: death caused by cardiac arrest or any other cause, unstable angina, congestive heart failure, use of intraaortic balloon counterpulsation, stroke, and intraoperative recall. Unstable angina was defined as precordial pain that lasted 30 min or more and that was unresponsive to rest and nitroglycerin and associated with transient ST-T segment changes on ECG without the occurrence of MI. The occurrence of congestive heart failure was determined by signs, symptoms, and radiographic evidence of pulmonary congestion requiring administration of diuretics, or by evidence of new or worsening ventricular failure (cardiac index  $\leq 2 \text{ l} \cdot \text{min}^{-1} \cdot \text{m}^{-2}$ ) requiring intraaortic balloon counterpulsation. Stroke was defined by the presence of a persistent focal central nervous system defect that was confirmed by computed tomography or magnetic resonance imaging.

#### Statistical Analysis

We used the statistical software program SAS (version 6.09; SAS Institute, Cary, NC) on the UNIX platform. For two-group comparison of demographic and clinical data that were discrete variables, we applied the Cochran-Mantel-Haenszel test adjusted for center. For continuous variables, we used the general linear model. When statistically significant, center and center-by-group interactions were retained in the model equation. Probability values were provided by *F* test on the sums of squares that were adjusted for center effect when the adjustment was statistically significant. A *P* value  $\leq 0.05$  on a two-tailed test was considered significant. When appropriate, a natural logarithmic transformation of the data was performed before calculating

the *F* test. The *Z* approximation was used to test the difference between two proportions. The incidence of intraoperative ischemic ST segment deviation was the primary outcome of this study. We did not correct for multiple comparisons between the two groups.

## Results

Demographic and clinical characteristics were similar for the two groups (table 1). The propofol-sufentanil group required more intraoperative administration of crystalloids.

#### Infusion of Anesthetics

To induce anesthesia, the propofol-sufentanil group received  $1.5 \pm 1 \text{ mg/kg}$  propofol and  $0.4 \pm 0.2 \mu\text{g/kg}$  sufentanil, and the sufentanil-midazolam group received  $4.3 \pm 2 \mu\text{g/kg}$  sufentanil and  $12.9 \pm 15.1 \mu\text{g/kg}$  midazolam. The total intraoperative doses were  $32.6 \pm 11.9 \text{ mg/kg}$  propofol and  $2.4 \pm 0.8 \mu\text{g/kg}$  sufentanil in the propofol-sufentanil group, and  $19 \pm 7.8 \mu\text{g/kg}$  sufentanil and  $160 \pm 60 \mu\text{g/kg}$  midazolam in the sufentanil-midazolam group.

STANPUMP anesthetic infusion records were available for 131 patients in the propofol-sufentanil group and for 126 patients in the sufentanil-midazolam group. Computer Assisted Continuous Infusion records were available for ten patients in the propofol-sufentanil group and for nine patients in the sufentanil-midazolam group. These records were used to derive the predicted  $C_e$  and mean infusion rates for the target-controlled infusions (fig. 1). The mean  $C_e$  for propofol was nearly  $3 \mu\text{g/ml}$ , the minimum required by the protocol. In the sufentanil-midazolam group, the  $C_e$  for sufentanil during and after CPB was less than the  $C_e$  before CPB but greater than the minimum required by the protocol.

The  $C_e$  was changed more often for propofol than for sufentanil, during induction of anesthesia ( $1.4 \pm 0.7$  vs.  $1.0 \pm 0.1$ ,  $P \leq 0.01$ ), tracheal intubation ( $1.2 \pm 1.6$  vs.  $0.5 \pm 0.8$ ,  $P \leq 0.01$ ), and the entire intraoperative period ( $11.7 \pm 7.1$  vs.  $7.3 \pm 3.6$ ,  $P \leq 0.001$ ).

#### Cardiovascular Medications

During operation, a greater percentage of patients in the propofol-sufentanil group was given inotropic/vasopressor medications, whereas a greater percentage of patients in the sufentanil-midazolam group was given antihypertensive/vasodilator medications, in-

Table 1. Demographic

| History               | CL |
|-----------------------|----|
| Age (yr)              |    |
| Body surface area     |    |
| Female gender         |    |
| Unstable angina       |    |
| Prior MI              |    |
| Prior MI within 3     |    |
| Hypertension          |    |
| Congestive heart      |    |
| Diabetes mellitus     |    |
| Diabetes mellitus     |    |
| Previous CABG S       |    |
| Previous CABG S       |    |
| Previous CABG S       |    |
| Angiographic Result   |    |
| Stenosed coronar      |    |
| Left main artery      |    |
| Two major arter       |    |
| All three major       |    |
| Ejection fraction (   |    |
| Left ventricular e    |    |
| (mmHg)                |    |
| Medications           |    |
| Preoperative morph    |    |
| Preoperative mid      |    |
| Preinduction prop     |    |
| (duration) $31 \pm$   |    |
| Preinduction mid      |    |
| Clinical course       |    |
| Number of grafts      |    |
| Duration of CPB (     |    |
| Duration of aortic    |    |
| Duration of postop    |    |
| Surgeon's assess      |    |
| Blood cardioplegia    |    |
| Intraoperative fluids |    |
| Crystalloids (ml)     |    |
| Colloids (mg)         |    |
| Packed red blood      |    |

Values are mean  $\pm$  SD  
percutaneous translumi  
\* Significant ( $P \leq 0.05$ )

cluding diuretic  
blockers (table 2)  
vasodilator medic  
the propofol-suf  
In both groups,  
blockers, calcium  
to be greater befo  
groups, the postop  
greater than the  
be greater than th

## TARGET CONTROL OF ANESTHETICS FOR CABG SURGERY

**Table 1. Demographic and Clinical Characteristics of Patients in the Propofol-Sufentanil and Sufentanil-Midazolam Groups**

| Characteristic                                                                                             | Propofol-Sufentanil Group<br>(n = 165) | Sufentanil-Midazolam Group<br>(n = 164) |
|------------------------------------------------------------------------------------------------------------|----------------------------------------|-----------------------------------------|
| <b>History</b>                                                                                             |                                        |                                         |
| Age (yr)                                                                                                   | 63.5 ± 9.8                             | 64.4 ± 9.5                              |
| Body surface area (m <sup>2</sup> )                                                                        | 1.96 ± 0.21                            | 1.95 ± 0.18                             |
| Female gender                                                                                              | 18%                                    | 18%                                     |
| Unstable angina                                                                                            | 47%                                    | 53%                                     |
| Prior MI                                                                                                   | 39%                                    | 39%                                     |
| Prior MI within 3 months                                                                                   | 15%                                    | 16%                                     |
| Hypertension                                                                                               | 61%                                    | 60%                                     |
| Congestive heart failure                                                                                   | 12%                                    | 5%                                      |
| Diabetes mellitus type I                                                                                   | 7%                                     | 10%                                     |
| Diabetes mellitus type II                                                                                  | 10%                                    | 10%                                     |
| Previous CABG Surgery                                                                                      | 12%                                    | 9%                                      |
| Previous PTCA                                                                                              | 16%                                    | 19%                                     |
| <b>Angiographic Results</b>                                                                                |                                        |                                         |
| Stenosed coronary arteries:                                                                                |                                        |                                         |
| Left main artery ≥ 50%                                                                                     | 21%                                    | 18%                                     |
| Two major arteries ≥ 70%                                                                                   | 39%                                    | 38%                                     |
| All three major arteries ≥ 70%                                                                             | 45%                                    | 41%                                     |
| Ejection fraction (%)                                                                                      | 56 ± 14                                | 54 ± 14                                 |
| Left ventricular end-diastolic pressure (mmHg)                                                             | 15 ± 6                                 | 17 ± 7                                  |
| <b>Medications</b>                                                                                         |                                        |                                         |
| Preoperative morphine (mg/kg)                                                                              | 0.10 ± 0.03                            | 0.11 ± 0.03                             |
| Preoperative midazolam (mg/kg)                                                                             | 0.05 ± 0.02                            | 0.05 ± 0.02                             |
| Preinduction propofol (mg · kg <sup>-1</sup> · h <sup>-1</sup> )<br>(duration 31 ± 19 min for 68 patients) | 2.3 ± 2.4                              |                                         |
| Preinduction midazolam (mg/kg) (75 patients)                                                               | —                                      | 0.03 ± 0.02                             |
| <b>Clinical course</b>                                                                                     |                                        |                                         |
| Number of grafts                                                                                           | 3.4 ± 1.0*                             | 3.1 ± 1.1                               |
| Duration of CPB (min)                                                                                      | 104 ± 34                               | 100 ± 38                                |
| Duration of aortic occlusion (min)                                                                         | 59 ± 24                                | 56 ± 24                                 |
| Duration of postoperative intubation (h)                                                                   | 14.3 ± 4.9                             | 16.4 ± 4.7                              |
| Surgeon's assessment: poor revascularization                                                               | 0%                                     | 1%                                      |
| Blood cardioplegia                                                                                         | 76%                                    | 82%                                     |
| <b>Intraoperative fluids</b>                                                                               |                                        |                                         |
| Crystalloids (ml)                                                                                          | 2,812 ± 1,433*                         | 2,422 ± 1,248                           |
| Colloids (ml)                                                                                              | 395 ± 495                              | 412 ± 491                               |
| Packed red blood cells (ml)                                                                                | 301 ± 493                              | 266 ± 528                               |

Values are mean ± SD or percentage of patients having the characteristic. CABG = coronary artery bypass graft; MI = myocardial infarction; PTCA = percutaneous transluminal coronary angioplasty; CPB = cardiopulmonary bypass.

\* Significant ( $P \leq 0.05$ ) difference between the two groups.

cluding diuretics,  $\beta$ -blockers, and calcium-channel blockers (table 2). After operation, antihypertensive/vasodilator medications were used more commonly for the propofol-sufentanil group (99% vs. 95%,  $P < 0.05$ ). In both groups, the percentage of patients given  $\beta$ -blockers, calcium-channel blockers, or nitrates tended to be greater before surgery than after surgery. In both groups, the postoperative use of diuretics tended to be greater than the intraoperative use, which tended to be greater than the preoperative use.

#### Hemodynamic Changes

Intraoperative hemodynamic data recorded every minute were available for 155 and 152 patients, respectively, in the propofol-sufentanil and sufentanil-midazolam groups. There were no significant differences in HR between the two groups during induction, intubation, incision, or sternotomy. The propofol-sufentanil group had lesser SBP during intubation ( $117 \pm 24$  vs.  $124 \pm 23$  mmHg,  $P = 0.02$ ) and incision ( $113 \pm 19$  vs.  $118 \pm 18$  mmHg,  $P = 0.05$ ). Before and after CPB, 73%



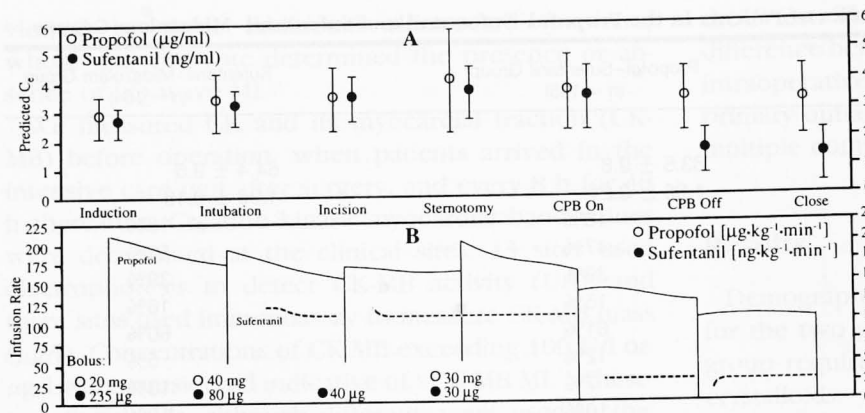

Fig. 1. Data are presented for the target-controlled infusions; that is, propofol and sufentanil, respectively, in the two groups, at various stages during coronary artery bypass graft surgery. (A) The predicted (mean  $\pm$  SD) target effect-site concentration ( $C_e$ ). (B) Mean rates of drug infusion. A rapid infusion was listed as a bolus. In the sufentanil-midazolam group, at the onset of cardiopulmonary bypass, no sufentanil administration was required for an average of 35 min, whereas after cardiopulmonary bypass, no sufentanil administration was required for an average of 6 min.

and 89% of the propofol-sufentanil group had SBP less than 90 mmHg for at least 1 min;  $5.7\% \pm 8.9\%$  and  $17.8\% \pm 17.2\%$  of the observations for these patients were less than 90 mmHg. In the sufentanil-midazolam group, before and after CPB, 65% and 79% of the patients had SBP less than 90 mmHg for at least 1 min;  $4.4\% \pm 8.4\%$  and  $10.8\% \pm 14\%$  of the observations for these patients were less than 90 mmHg.

The percentage of patients with protocol-defined episodes of hypotension was greater in the propofol-sufentanil group in all periods (fig. 2A). The percentage of patients with episodes of hypertension was greater in the sufentanil-midazolam group in the post-CPB and total intraoperative periods (fig. 2A). The total intraoperative duration of episodes of hypotension was greater for the propofol-sufentanil group and duration of episodes of hypertension was greater for the sufentanil-midazolam group (fig. 2B). The occurrence of tachycar-

dia or bradycardia did not differ significantly between the two groups (fig. 2). There were no clinically important differences in cardiac output or pulmonary artery pressures between the two groups.

#### Ischemic Changes on Holter ECG

Continuous (Holter) ECG data were obtained for 142 patients in the propofol-sufentanil group and for 152 patients in the sufentanil-midazolam group. The primary endpoint, the percentage of patients having intraoperative ST segment deviation ( $23\% \pm 6\%$  vs.  $24\% \pm 6\%$ ,  $P = 0.86$ ), did not differ significantly for the two groups. In addition, the percentage of patients having S-T segment deviation during or after surgery ( $29\% \pm 6\%$  vs.  $36\% \pm 6\%$ ,  $P = 0.20$ ) did not differ significantly for the two groups.

The durations of interpretable and uninterpretable periods on ECG (fig. 3A), the percentage of patients who

Table 2. Percentage of Patients Given Cardiovascular Medications during Various Periods

| Medications                          | Preoperative              |                            | Intraoperative            |                            | Postoperative Day #0,1    |                            |
|--------------------------------------|---------------------------|----------------------------|---------------------------|----------------------------|---------------------------|----------------------------|
|                                      | Propofol-Sufentanil Group | Sufentanil-Midazolam Group | Propofol-Sufentanil Group | Sufentanil-Midazolam Group | Propofol-Sufentanil Group | Sufentanil-Midazolam Group |
| $\beta$ -blockers                    | 53                        | 55                         | 14                        | 18                         | 42                        | 37                         |
| Calcium-channel blockers             | 56                        | 50                         | 7                         | 4                          | 38*                       | 28                         |
| Nitroprusside                        | 0                         | 1                          | 42*                       | 67                         | 77                        | 73                         |
| Nitrates                             | 64                        | 60                         | 28                        | 23                         | 44                        | 38                         |
| Diuretics                            | 18*                       | 10                         | 37                        | 39                         | 67                        | 73                         |
| Other antihypertensives/vasodilators | 24                        | 23                         | 1                         | 3                          | 28                        | 20                         |
| Any of the above                     | 94                        | 92                         | 70*                       | 90                         | 99*                       | 95                         |
| Antiarrhythmics                      | 13*                       | 7                          | 47                        | 44                         | 21                        | 15                         |
| Inotropes/vasopressors               | 0                         | 1                          | 93*                       | 84                         | 58                        | 52                         |

\* Significant ( $P \leq 0.05$ ) difference between the two groups.

Fig. 2. (A) The per- had episodes of her hypertension (SBP), tachycardia (HR), (B) The minutes of quality per hour of ing, and after cardi during the entire in mean hours of mo are also listed. Val means and standa tients in each gro the propofol-sufe midazolam groups ar and  $\dagger P \leq 0.01$ .

had ST segment 3B), and the num starting per hour the two groups. tended to have g depression (fig. 3E) and area un segment deviation especially in the p HR at the onset crease progressively after operation (fi of ST segment d min greater than However, for bot sodes, especially in HR (fig. 3H).

Because ST seg the CPB and pos of patients who tion at any time release of aortic pattern was simi deviation primar lease of aortic oc Multiplying the deviation for each of hemodynamic 307 patients who Holter ECG data overlaps. No tre observed.

Left Ventricula Intraoperative l ties detected via

## TARGET CONTROL OF ANESTHETICS FOR CABG SURGERY

Fig. 2. (A) The percentage of patients who had episodes of hemodynamic abnormality: hypertension ( $\uparrow$ SBP), hypotension ( $\downarrow$ SBP), tachycardia ( $\uparrow$ HR), and bradycardia ( $\downarrow$ HR). (B) The minutes of hemodynamic abnormality per hour of monitoring; before, during, and after cardiopulmonary bypass, and during the entire intraoperative period. The mean hours of monitoring for each period are also listed. Values in B are presented as means and standard deviations for all patients in each group. Differences between the propofol-sufentanil and sufentanil-midazolam groups are significant at  $*P \leq 0.05$  and  $\dagger P \leq 0.01$ .

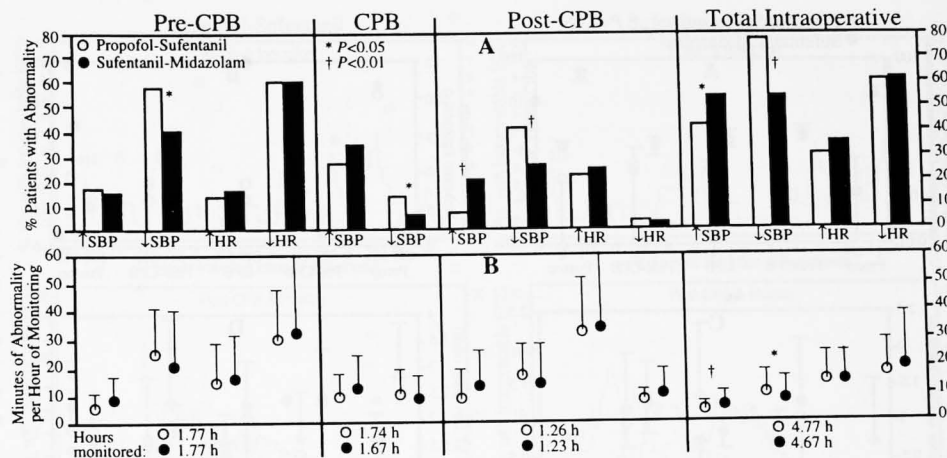

had ST segment deviation starting in each period (fig. 3B), and the number of episodes of ST segment deviation starting per hour in each period (fig. 3C) were similar for the two groups. For both groups, ST segment elevation tended to have greater absolute value than ST segment depression (fig. 3D). For both groups, the duration (fig. 3E) and area under the curve (fig. 3F) per hour of ST segment deviation tended to be greater during operation, especially in the post-CPB period. For both groups, mean HR at the onset of ST segment deviation tended to increase progressively during operation and to be highest after operation (fig. 3G). For both groups, HR at the onset of ST segment deviation generally was 5 to 10 beats/min greater than the HR at the local baseline (fig. 3H). However, for both groups, a substantial number of episodes, especially during CPB, occurred with a reduction in HR (fig. 3H).

Because ST segment deviation was most prevalent in the CPB and post-CPB periods (fig. 3), the percentage of patients who had ST segment depression or elevation at any time during Holter ECG monitoring after release of aortic occlusion was determined (fig. 4). The pattern was similar for both groups, with ST segment deviation primarily occurring in the first 8 h after release of aortic occlusion.

Multiplying the number of episodes of ST segment deviation for each patient by the number of episodes of hemodynamic abnormality and adding this for all 307 patients who had the required hemodynamic and Holter ECG data yielded a possible maximum of 2,052 overlaps. No trend was identified in the 69 overlaps observed.

#### Left Ventricular Wall Motion Abnormalities

Intraoperative left ventricular wall motion abnormalities detected *via* TEE were similar for the two groups

(table 3). For both groups, unlike left ventricular wall motion abnormality (table 3), ST segment deviation was more common after CPB than before CPB (fig. 3).

#### Other Adverse Outcomes

One patient in the propofol-sufentanil group died perioperatively of cardiac causes. The incidence of Q wave MI was 7% in the propofol-sufentanil group and 4% in the sufentanil-midazolam group. The incidence of CK-MB  $\geq 100$  U/l or  $\mu\text{g/l}$  was 7% in the propofol-sufentanil group and 6% in the sufentanil-midazolam group. New postoperative unstable angina or congestive heart failure was not diagnosed in any patient. Intraaortic balloon counterpulsation was used for two patients in the propofol-sufentanil group and four patients in the sufentanil-midazolam group. Stroke was diagnosed in one patient in each group. None of the patients reported intraoperative awareness.

#### Discussion

Our randomized trial demonstrates that anesthetic regimens based on target-controlled infusions of propofol or sufentanil, supplemented by sufentanil or midazolam, respectively, are suitable for CABG surgery. Because a single anesthetic agent is not suitable in clinical practice,<sup>3</sup> combinations of anesthetic agents were administered.

The primary endpoint, the percentage of patients having intraoperative ST segment depression or elevation ( $23\% \pm 6\%$  vs.  $24\% \pm 6\%$ ,  $P = 0.86$ ), was not significantly different for the propofol-sufentanil and sufentanil-midazolam groups. Systolic blood pressure and HR observed every minute during operation revealed that abnormalities were more common than





## TARGET CONTROL OF ANESTHETICS FOR CABG SURGERY

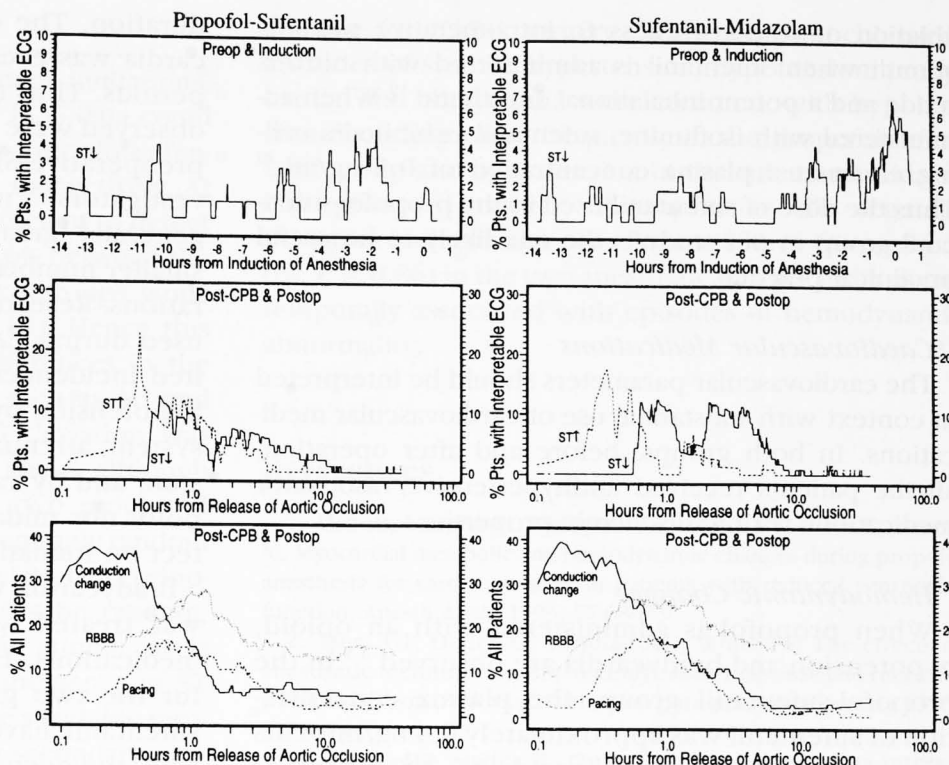

Fig. 4. For the propofol-sufentanil or sufentanil-midazolam groups, the temporal distribution of percentage of patients with Holter electrocardiograms interpretable for ST segment deviation who had ST segment depression (↓ST) or ST segment elevation (↑ST). Also presented is the temporal distribution after release of aortic occlusion of the percentage of all patients with right bundle branch block, ventricular pacing, or cardiac conduction changes making the Holter electrocardiogram uninterpretable for ST segment deviation. Before cardiopulmonary bypass, only ST segment depression was common and is presented.

group. The target concentration of propofol was chosen based on data derived during noncardiac surgery and may not be optimal for CABG surgery. Patients in the propofol-sufentanil group were given  $0.05 \pm 0.02$  mg/kg ( $3.9 \pm 1.8$  mg) midazolam 60 to 90 min before surgery. The presence of midazolam could have contributed to the hypotension observed in the

propofol-sufentanil group. The amnesic properties of midazolam that would allow infusion of propofol to be decreased during hypotension without risking recall were not used in this study.

The estimated plasma concentration of sufentanil in the propofol-sufentanil group was 0.38 to 0.45 ng/ml. This is the concentration reported to be required for

Table 3. Left Ventricular Wall Motion Abnormalities Detected by Transesophageal Echocardiography

| Characteristic                                 | Before Cardiopulmonary Bypass |                            | After Cardiopulmonary Bypass |                            |
|------------------------------------------------|-------------------------------|----------------------------|------------------------------|----------------------------|
|                                                | Propofol-Sufentanil Group     | Sufentanil-Midazolam Group | Propofol-Sufentanil Group    | Sufentanil-Midazolam Group |
| No. of evaluated patients                      | 104                           | 96                         | 100                          | 97                         |
| Hours monitored                                | $1.4 \pm 0.6$                 | $1.3 \pm 0.5$              | $0.9 \pm 0.3$                | $0.9 \pm 0.3$              |
| No. of patients with abnormality               | 20                            | 25                         | 23                           | 30                         |
| Minutes of abnormality per hour of monitoring† | $10.2 \pm 8.9$                | $14 \pm 10.6$              | $14.7 \pm 8.3$               | $19.4 \pm 10.7$            |
| Average duration of episode (min)              | $11.9 \pm 10.8$               | $12.9 \pm 8.4$             | $11.9 \pm 8.2$               | $16.6 \pm 13.8$            |
| Number of patients with abnormality in:        |                               |                            |                              |                            |
| Posterior wall                                 | 9                             | 17                         | 7*                           | 20                         |
| Septum                                         | 7                             | 11                         | 7                            | 8                          |
| Anterior wall                                  | 4                             | 3                          | 10                           | 12                         |
| Lateral wall                                   | 2                             | 1                          | 5                            | 5                          |

Values are mean  $\pm$  SD.

\* Significant ( $P \leq 0.05$ ) difference between the two groups.

† Only for patients with abnormality.





### Study Limitations

The sample size used imposed certain limitations. The number of patients whose Holter ECG data could be evaluated was 142 and 152, for the propofol-sufentanil and sufentanil-midazolam groups, respectively. At  $P = 0.05$ , this number of patients is sufficient to detect a statistically significant difference of 16% between the incidence of an abnormality in the two groups while maintaining a power of 0.90 ( $\beta = 0.10$ ). Hence this study was not powered to detect differences in the incidence of hard adverse outcomes such as MI and stroke. The incidence of ST segment deviation was used as the primary outcome in this study, although the use of this measure to compare two groups of ambulatory patients is limited by the seemingly random occurrence of ischemic ST segment deviation.<sup>30</sup> Perioperatively, ST segment deviation may not be random, but may occur in response to specific stimuli, as is true of treadmill testing.<sup>31,32</sup> Thus the incidence of ST segment deviation was considered to be a suitable measure of outcome. Because of the many secondary endpoints, a significant difference observed between the two groups for any secondary endpoint is difficult to interpret. The results suggest that clinically important differences in hard adverse outcomes are unlikely between the two groups.

Inadequate *a priori* knowledge of pharmacokinetics and the pharmacodynamics of the various anesthetic agents during CABG surgery precluded their optimal use. Because our aim was to evaluate two clinically useful anesthetic infusion regimens, none of the anesthetic agents was infused by a predetermined protocol, regardless of clinical response, which has substantial variability in the population. Although our approach reduced uniformity in administering the anesthetics to different patients, it is likely to have increased uniformity in the clinical responses of different patients.

Early extubation was not performed during this study because this practice was not routine at the participating clinical sites when the patients were enrolled, from June 1992 to December 1993. Because of this and other changes since then, the issues of cost and length of stay were not addressed.

### Conclusions

Target-controlled infusion of propofol supplemented by sufentanil infusion, or target-controlled infusion of sufentanil supplemented by midazolam infusion are

suitable for CABG surgery. With the protocol used, episodes of systolic hypertension, hypotension, tachycardia, and bradycardia were common, with hypotension occurring more frequently in the propofol-sufentanil group and hypertension in the sufentanil-midazolam group. However, intraoperative ST segment deviation had a similar prevalence ( $23\% \pm 6\%$  vs.  $24 \pm 6\%$ ,  $P = 0.86$ ) in the two anesthetic groups and was not temporally associated with episodes of hemodynamic abnormality.

### References

- Hall RI, Murphy JT, Landymore R, Pollak PT, Doak G, Murray M: Myocardial metabolic and hemodynamic changes during propofol anesthesia for cardiac surgery in patients with reduced ventricular function. *Anesth Analg* 1993; 77:680-9
- Mora CT, Dudek C, Torjman MC, White PF: The effects of anesthetic technique on the hemodynamic response and recovery profile in coronary revascularization patients. *Anesth Analg* 1995; 81:900-10
- Stanski DR, Shafer SL: Quantifying anesthetic drug interaction. Implications for drug dosing (editorial). *ANESTHESIOLOGY* 1995; 83:1-5
- Vuyk J, Engbers F, Burm A, Vletter A, Griever G, Olofsen E, Bovill J: Pharmacodynamic interaction between propofol and alfentanil when given for induction of anesthesia. *ANESTHESIOLOGY* 1996; 84:288-99
- Leslie K, Sessler D, Smith W, Larson M, Ozaki M, Blanchard D, Crankshaw D: Prediction of movement during propofol/nitrous oxide anesthesia. Performance of concentration, electroencephalographic, pupillary, and hemodynamic indicators. *ANESTHESIOLOGY* 1996; 84:52-63
- Mayer N, Legat K, Weinstabl C, Zimpfer M: Effects of propofol on the function of normal, collateral-dependent and ischemic myocardium. *Anesth Analg* 1993; 76:33-9
- Hudson RJ, Bergstrom RG, Thomson IR, Sabourin MA, Rosenbloom M, Strunin L: Pharmacokinetics of sufentanil in patients undergoing abdominal aortic surgery. *ANESTHESIOLOGY* 1989; 70:426-31
- Gepts E, Camu F, Cockshott ID, Douglas EJ: Disposition of propofol administered as constant rate intravenous infusions in humans. *Anesth Analg* 1987; 66:1256-63
- The Multicenter Study of Perioperative Ischemia (McSPI) Research Group: Effects of acadesine on the incidence of myocardial infarction and adverse cardiac outcomes after coronary artery bypass graft surgery. *ANESTHESIOLOGY* 1995; 83:658-73
- Mangano DT, Hollenberg M, Fegert G, Meyer M, London M, Tubau J, Krupski W, SPI Research Group: Perioperative myocardial ischemia in patients undergoing noncardiac surgery. I. Incidence and severity during the four-day perioperative period. *J Am Coll Cardiol* 1991; 17:843-50
- Mangano DT, Wong MG, London MJ, Tubau JF, Rapp JA, SPI Research Group: Perioperative myocardial ischemia in patients undergoing noncardiac surgery. II. Incidence and severity during the 1st week after surgery. *J Am Coll Cardiol* 1991; 17:851-7
- Jain U, Wallis DE, Moran JF: Significance of electrocardio-



graphic ST elevation during coronary artery bypass surgery. *Anesth Analg* 1994; 78:638-43

13. Jain U: Myocardial infarction during coronary artery bypass surgery. *J Cardiothorac Vasc Anesth* 1992; 6:612-23

14. Mangano DT, Browner WS, Hollenberg M, London MJ, Tubau JF, Tateo IM, SPI Research Group: Association of perioperative myocardial ischemia with cardiac morbidity and mortality in men undergoing noncardiac surgery. *N Engl J Med* 1990; 323:1781-8

15. Prineas RJ, Crow RS, Blackburn H: *The Minnesota Code Manual of Electrocardiographic Findings*. Boston, Wright, 1982

16. Vuyk J, Lim T, Engbers FHM, Burm AG, Vletter AA, Bovill JG: The pharmacodynamic interaction of propofol and alfentanil during lower abdominal surgery in women. *ANESTHESIOLOGY* 1995; 83:8-22

17. Shafer A, Doze VA, Shafer SL, White PF: Pharmacokinetics and pharmacodynamics of propofol infusions during general anesthesia. *ANESTHESIOLOGY* 1988; 69:348-56

18. Bailey J, Mora C, Shafer S, McSPI Research Group: The pharmacokinetics of propofol in adult patients undergoing coronary revascularization. *ANESTHESIOLOGY* 1996; 84:1288-97

19. Shafer SL, Varvel JR: Pharmacokinetics, pharmacodynamics, and rational opioid selection. *ANESTHESIOLOGY* 1991; 74:53-63

20. Brunner M, Braithwaite P, Jhaveri R, McEwan A, Goodman D, Smith L, Glass P: MAC reduction of isoflurane by sufentanil. *Br J Anaesth* 1994; 72:42-6

21. Pagel PS, Wartier DC: Negative inotropic effects of propofol as evaluated by the regional preload recruitable stroke work relationship in chronically instrumented dogs. *ANESTHESIOLOGY* 1993; 78:100-8

22. Ebert TJ, Muzi M: Propofol and autonomic reflex function in humans. *Anesth Analg* 1994; 78:369-75

23. Chang KSK, Davis RF: Propofol produces endothelium-independent vasodilation and may act as a  $Ca^{2+}$  channel blocker. *Anesth Analg* 1993; 76:24-32

24. Gelissen H, Epema A, Henning R, Krijnen H, Hennis P, den Hertog A: Inotropic effects of propofol, thiopental, midazolam, etomidate, and ketamine on isolated human atrial muscle. *ANESTHESIOLOGY* 1996; 84:397-403

25. Stowe DF, Bosnjak ZJ, Kampine JP: Comparison of etomidate, ketamine, midazolam, propofol, and thiopental on function and metabolism of isolated hearts. *Anesth Analg* 1992; 74:547-58

26. Mokken FC, Henry P, Gelb AW, Biervliet JD, Hardeman MR, Kedaria M, van Wezel HB: The effects of propofol compared to high-dose fentanyl anesthesia on rheologic parameters in coronary artery surgery. *J Cardiothorac Vasc Anesth* 1993; 7:10-6

27. Tamaki N, Yasuda T, Moore RH, Gill JB, Boucher CA, Hutter AM Jr, Gold HK, Strauss HW: Continuous monitoring of left ventricular function by an ambulatory radionuclide detector in patients with coronary artery disease. *J Am Coll Cardiol* 1988; 12:669-79

28. Quyyumi AA, Panza JA, Diodati JG, Dilsizian V, Callahan TS, Bonow RO: Relation between left ventricular function at rest and with exercise and silent myocardial ischemia. *J Am Coll Cardiol* 1992; 19:962-7

29. Wahr JA, Plunkett JJ, Ramsay JG, Reeves J, Jain U, Ley C, Wilson R, Mangano DT, McSPI Research Group: Cardiovascular responses during sedation following coronary revascularization: Incidence of myocardial ischemia and hemodynamic episodes with propofol versus midazolam. *ANESTHESIOLOGY* 1996; 84:1350-60

30. Celermajer DS, Spiegelhalter DJ, Deanfield M, Deanfield JE: Variability of episodic ST segment depression in chronic stable angina: Implications for individual and group trials of therapeutic efficacy. *J Am Coll Cardiol* 1994; 23:66-73

31. Jain U: Myocardial ischemia after cardiopulmonary bypass. *J Card Surg* 1995; 10:520-6

32. Jain U: Myocardial injury during reoperation for coronary artery bypass surgery. *J Cardiothorac Vasc Anesth* 1995; 9:389-94

#### Appendix I. Principal Investigators and Clinical Sites

Wayne Bellows, M.D., Kaiser Permanente Medical Center, San Francisco, CA

Jacqueline M. Leung, M.D., University of California, San Francisco, CA

Mark E. Comunale, M.D., Beth Israel Hospital, Boston, MA  
Christina Mora Mangano, M.D., Emory University, Atlanta, GA  
(Currently at Stanford University, Stanford, CA)

Joyce Wahr, M.D., University of Michigan, Ann Arbor, MI  
Richard Wolman, M.D., Medical College of Virginia, Richmond, VA

Bruce Spiess, M.D., University of Washington, Seattle, WA  
Joseph Mathew, M.D., Yale University, New Haven, CT

Colleen Koch, M.D., Cleveland Clinic Foundation, Cleveland, OH  
Simon C. Body, M.D., Brigham and Women's Hospital, Boston, MA  
Arnold Friedman, M.D., Cedars Sinai Medical Center, Los Angeles, CA

C. Y. Lin, M.D., University of Chicago, Chicago, IL

Onofrio Patafio, M.D., Cornell University, New York, NY

Thomas Stanley, M.D., Duke University, Durham, NC

## TARGET CONTROL OF ANESTHETICS FOR CABG SURGERY

---

### Appendix II. Core Laboratories

---

|                                       |                                                                                                                                                          |
|---------------------------------------|----------------------------------------------------------------------------------------------------------------------------------------------------------|
| Director:                             | Dennis T. Mangano, Ph.D., M.D.                                                                                                                           |
| Holter Analysis:                      | Uday Jain, Ph.D., M.D., Krzysztof H. Ziola, M.D., Dean Alokozai, M.D., Nadir Alocozy, M.D.,<br>Ricardo Cea, M.D., Malgorzata Ziola, M.D., Kate Haratonik |
| Hemodynamic Analysis:                 | Alexander Gaber, M.S., Simon C. Body, M.B., Ch.B., F.A.N.Z.C.A., Marilena Mirica, M.D.,<br>Uday Jain, Ph.D., M.D., Gerard M. Ozanne, M.D.                |
| 12-Lead ECG Analysis:                 | Uday Jain, Ph.D., M.D., Adam Zhang, M.D., Vladimir Titov, M.D., Ph.D.,<br>Tatiana Titov, M.D., Ph.D., Marilena Mirica, M.D.                              |
| Anesthetic Infusion Analysis:         | Elizabeth Youngs, M.D.                                                                                                                                   |
| TEE Analysis:                         | Esperanza Vioria, Adam Zhang, M.D., Gregory Schwartz, M.D.                                                                                               |
| Data Management/Statistical Analysis: | Robert Wilson, Ph.D., Alexander Gaber, M.S., Long Ngo, M.S.                                                                                              |
| Editing/Transcription:                | Diane Beatty, Barbara O'Donnell, Pauline Snider, Winifred von Ehrenburg, Mark Riddle,<br>Corbin Krug                                                     |

---

A number of other persons at the Ischemia Research and Education Foundation, and at the clinical sites contributed to the collection and analysis of data.
